# Supplementary material for: Age of air from ACE-FTS measurements of sulfur hexafluoride
Source: Copernicus journal article supplement (doi:10.5194/egusphere-2024-2117), 2024-07-22
Supplement: Supplementary file 1 [file egusphere-2024-2117-supplement.pdf]

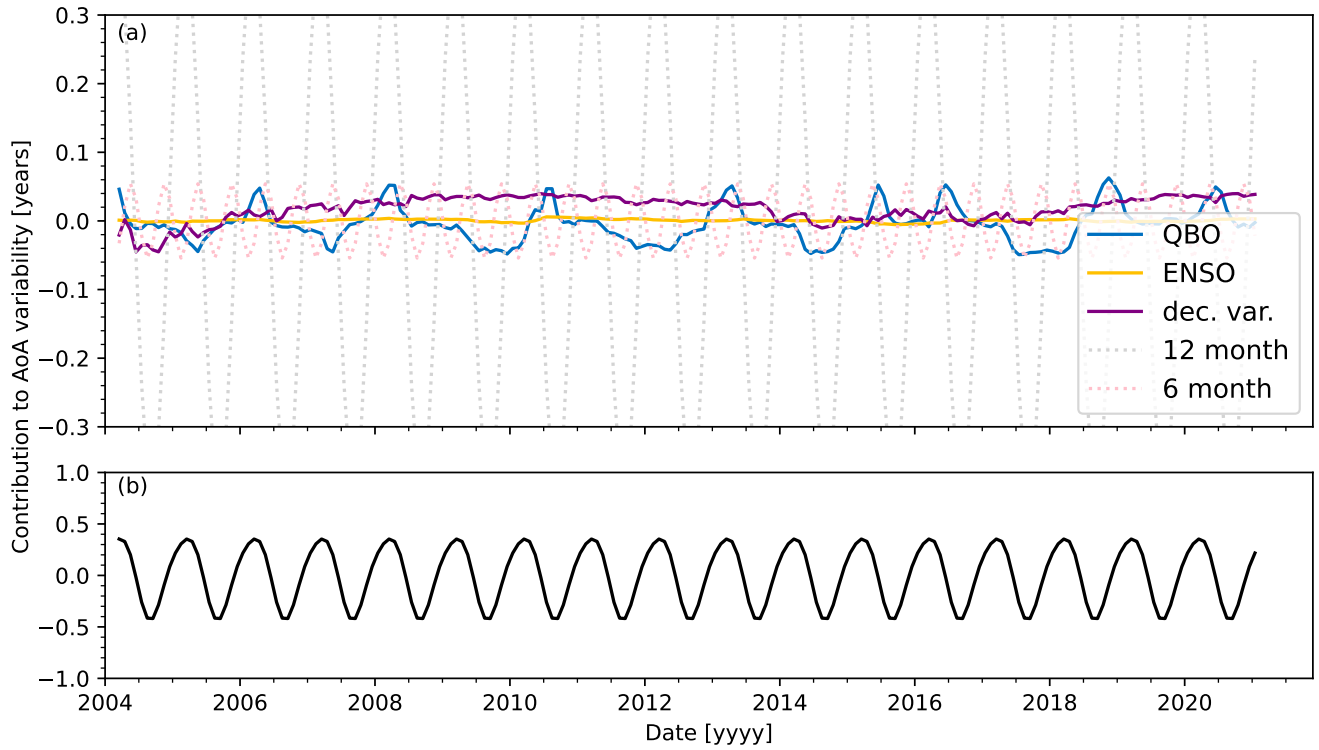

**Figure S1.** (a) The contribution (in years) of each type of interannual variability to the fitted age of air for 40-50°N, 14-17 km. (b) The total contribution of the 12- and 6-month seasonal cycles

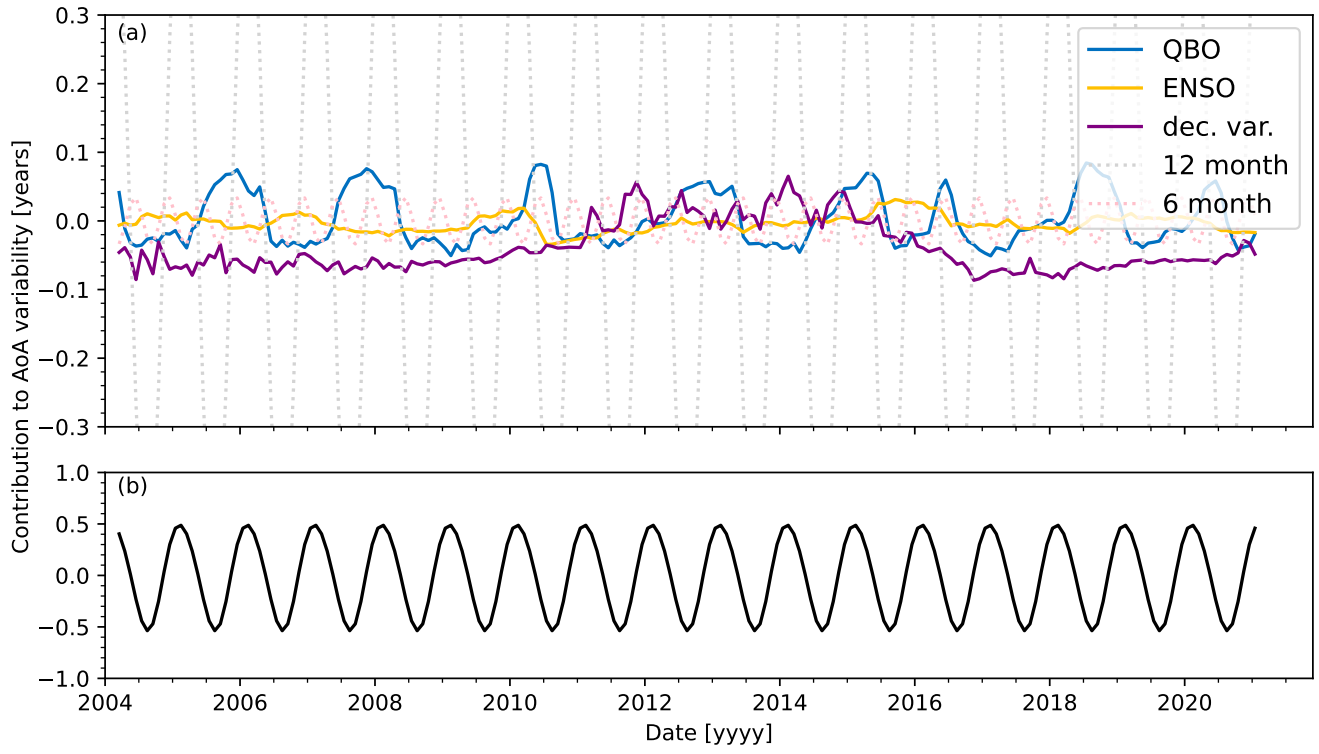

**Figure S2.** Same as Fig. S1 but for 40-50°N, 17-20 km.

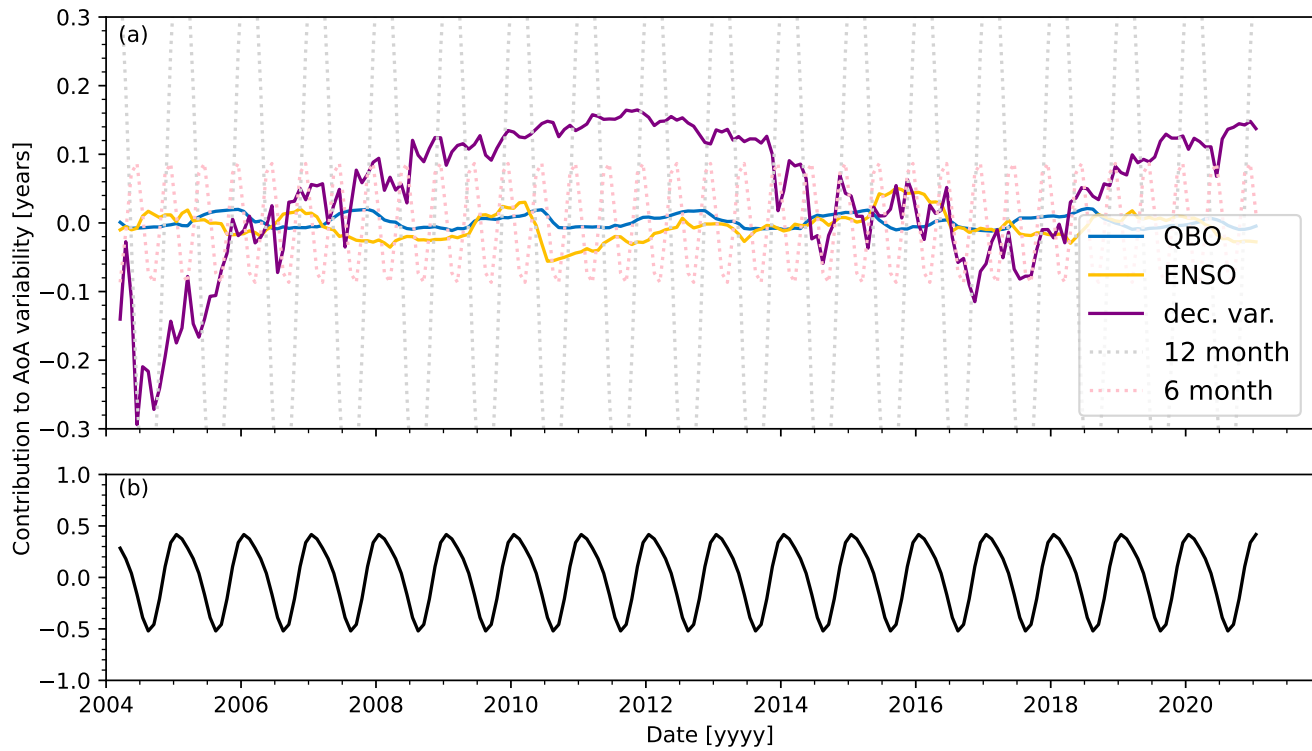

**Figure S3.** Same as Fig. S1 but for 50-60°N, 14-17 km.

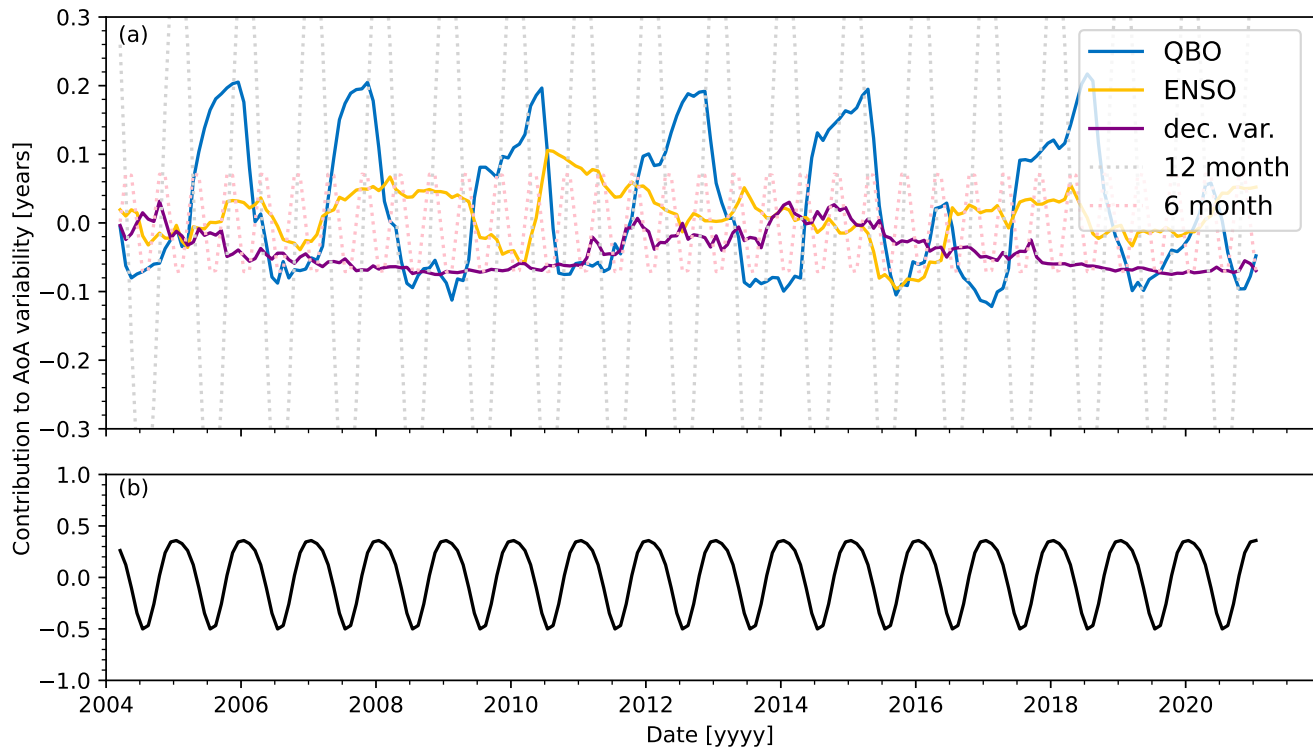

**Figure S4.** Same as Fig. S1 but for 50-60°N, 17-20 km.

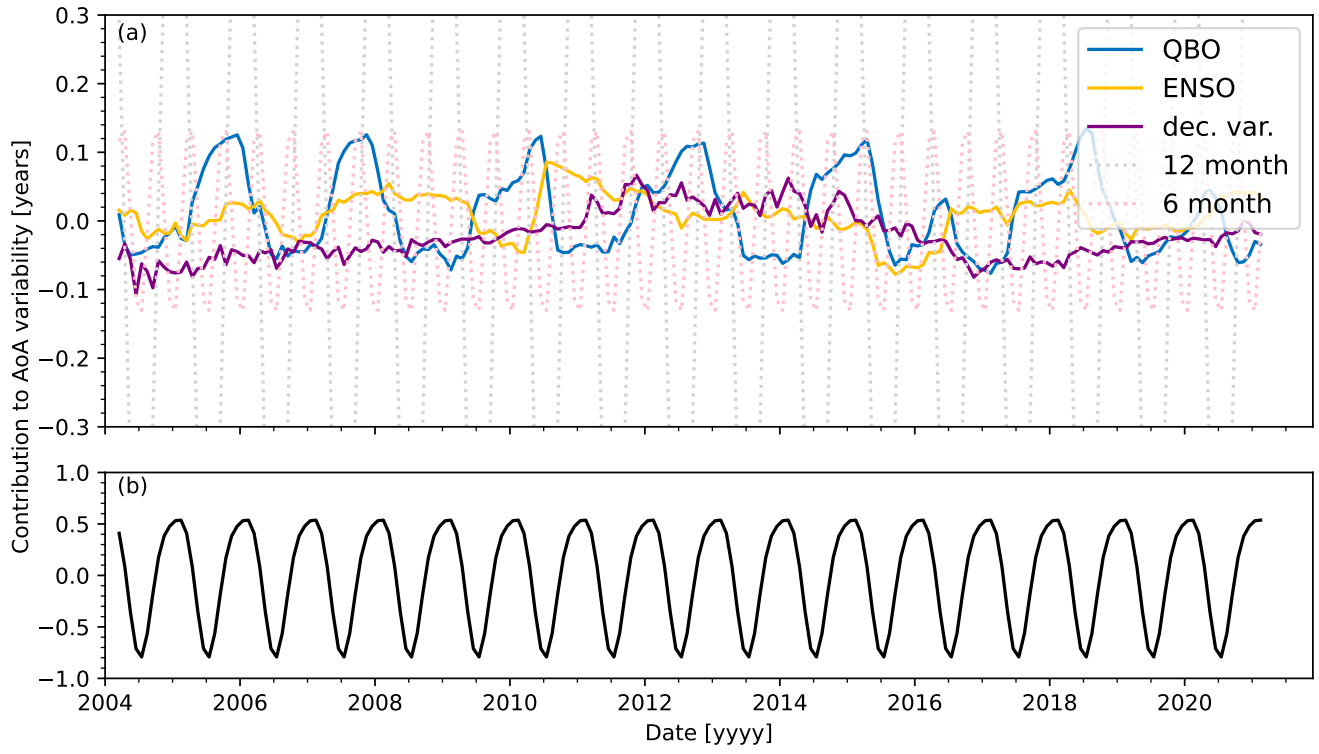

**Figure S5.** Same as Fig. S1 but for 60-70°N, 17-20 km.

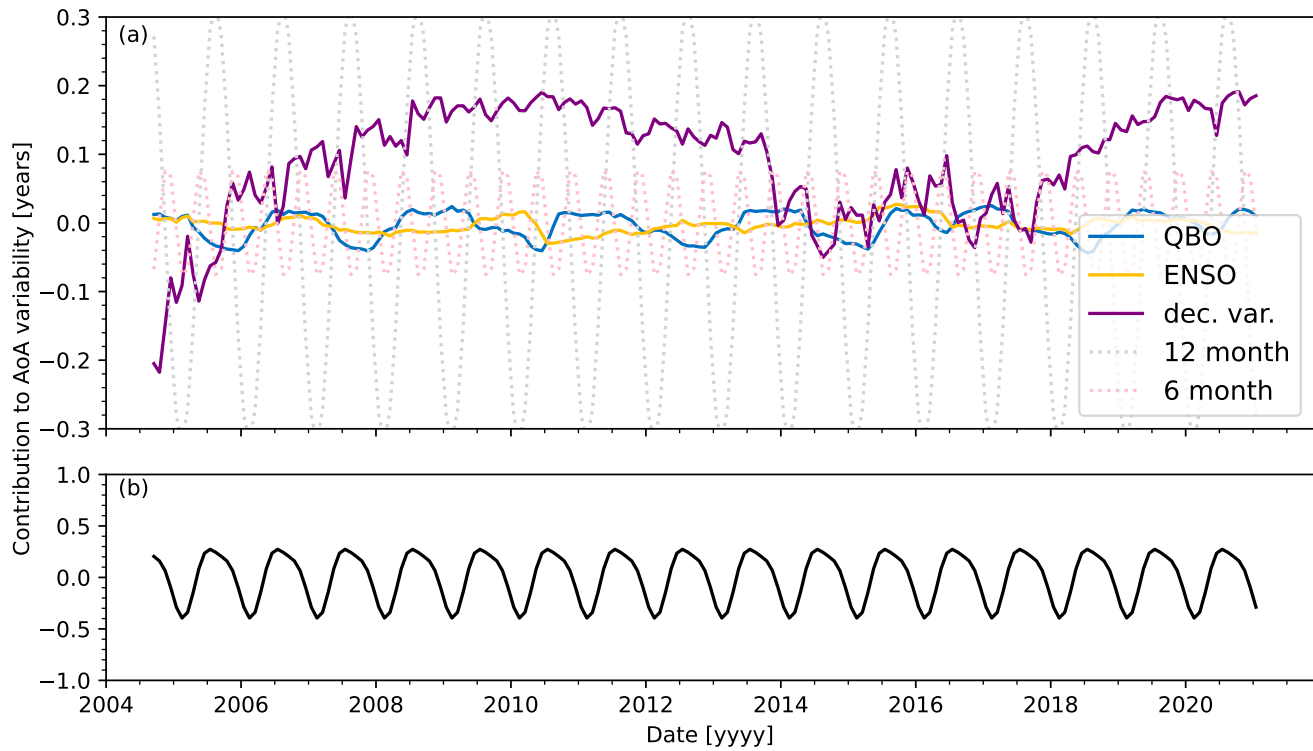

**Figure S6.** Same as Fig. S6 but for 40-50°S, 14-17 km.

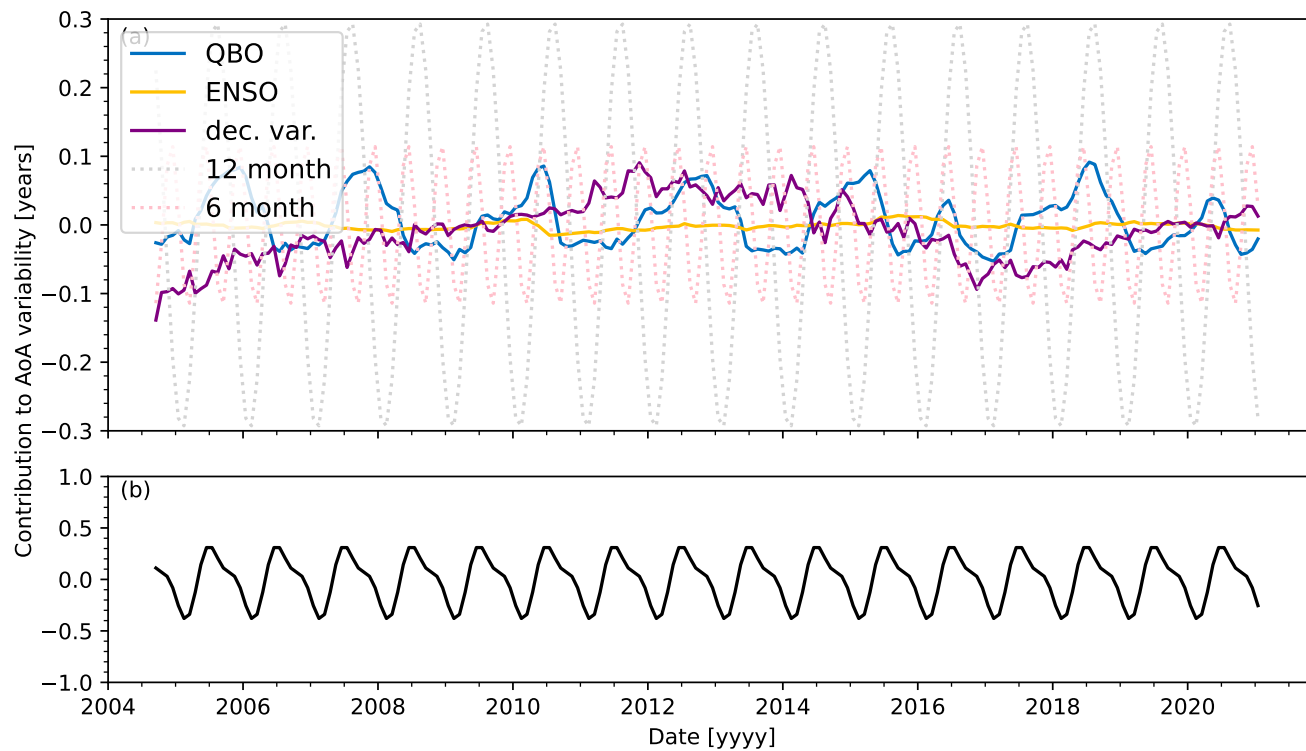

**Figure S7.** Same as Fig. S6 but for 40-50°S, 17-20 km.

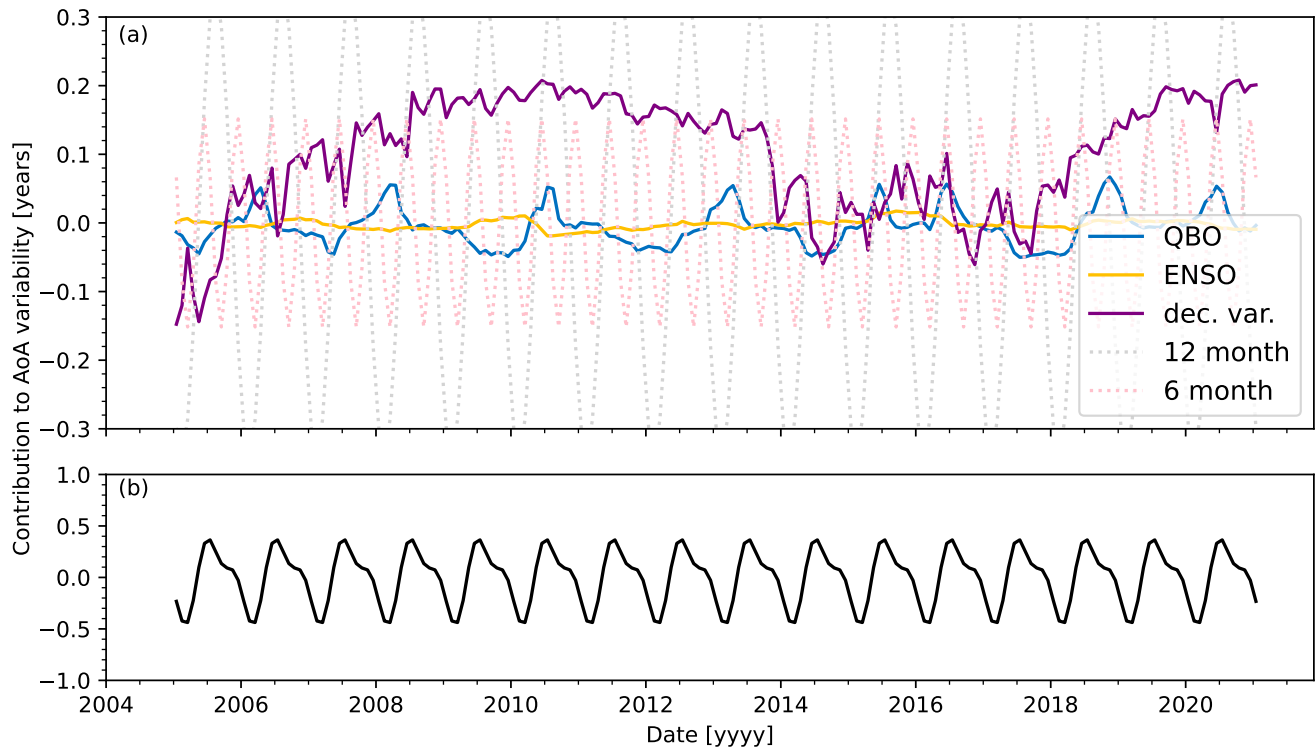

**Figure S8.** Same as Fig. S6 but for 50-60°S, 14-17 km.



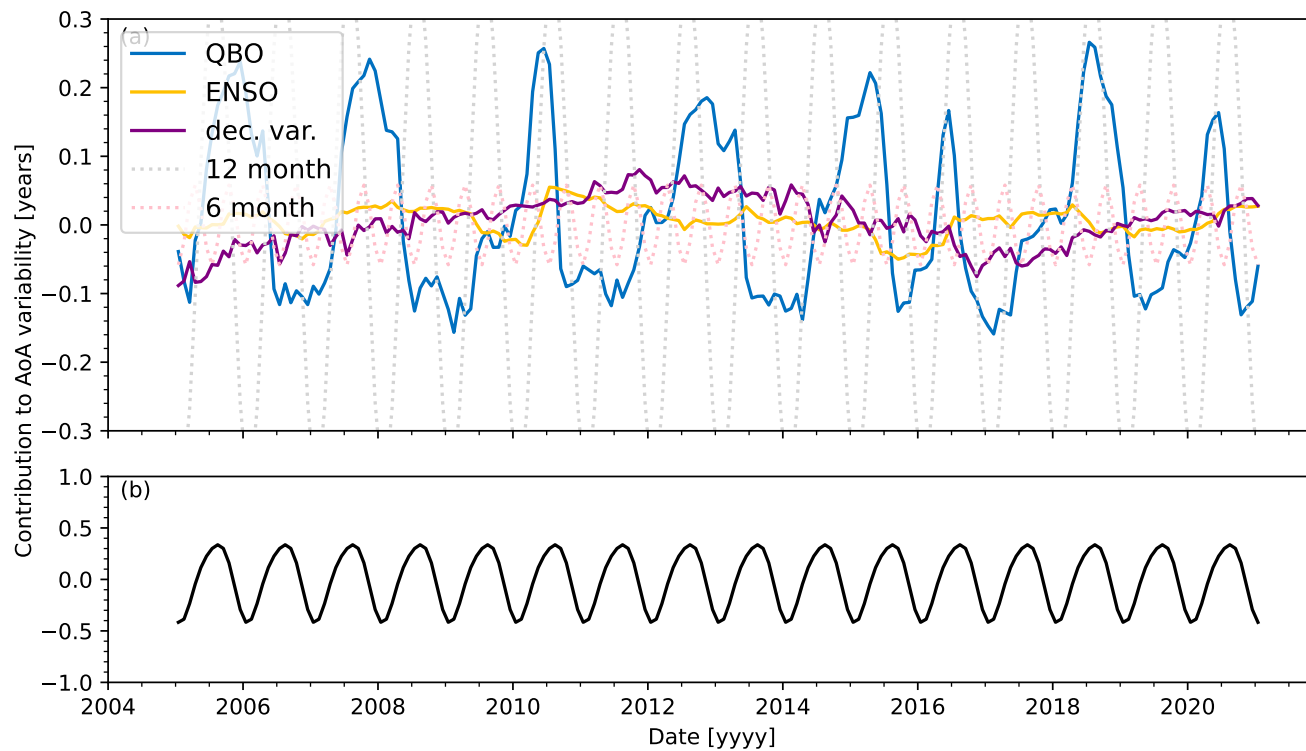

**Figure S9.** Same as Fig. S6 but for 50-60°S, 17-20 km.

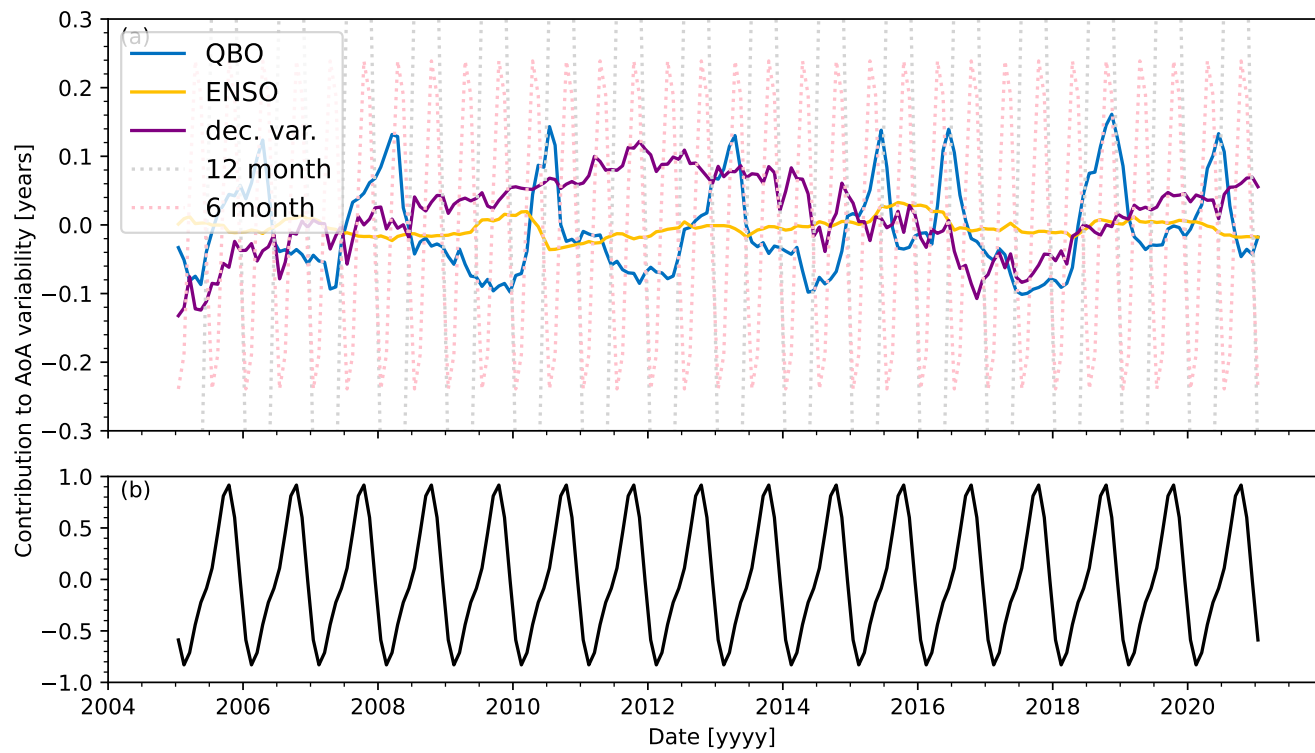

**Figure S10.** Same as Fig. S6 but for 60-70°S, 14-17 km.

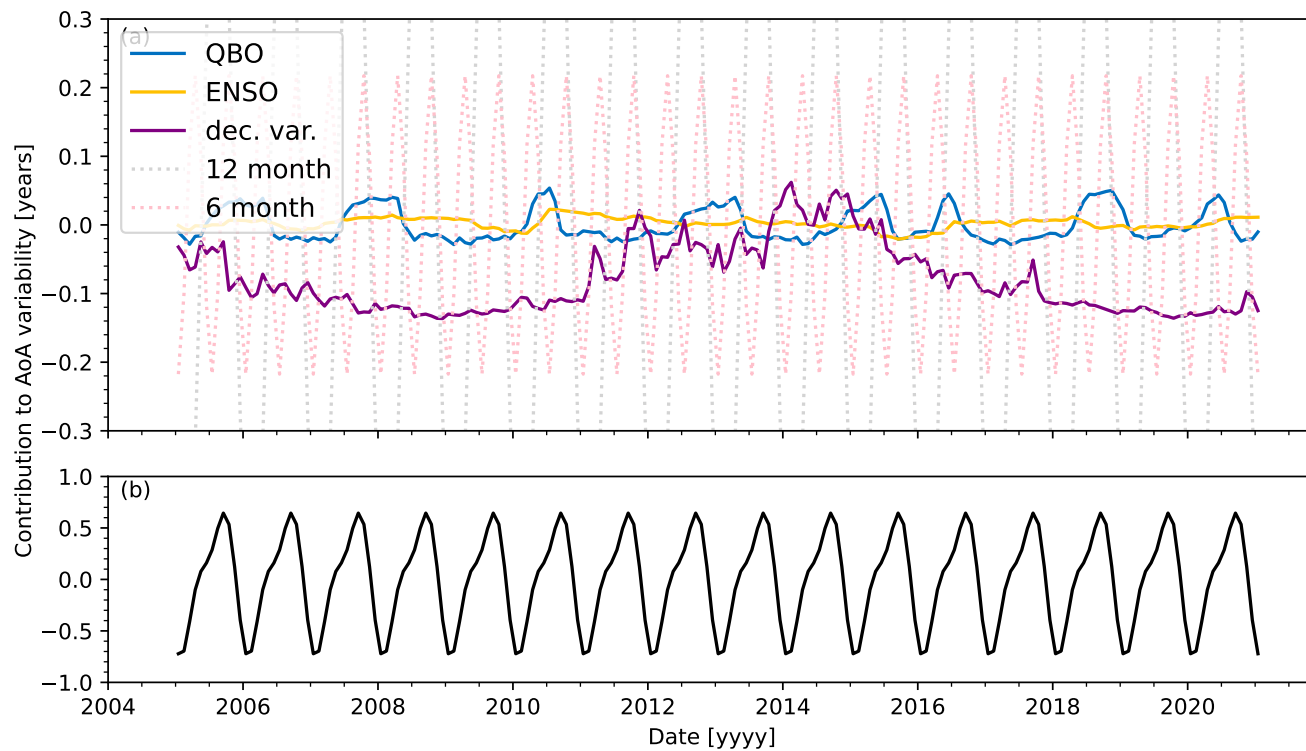

**Figure S11.** Same as Fig. S6 but for 60-70°S, 17-20 km.
